# Supplementary material for: Absent in Melanoma (AIM)2 Promotes the Outcome of Islet Transplantation by Repressing Ischemia-Induced Interferon (IFN) Signaling
Source: MDPI journal article supplement (doi:10.3390/cells13010016), 2023-12-20
Supplement: s1 [file s1]

# Figure S1

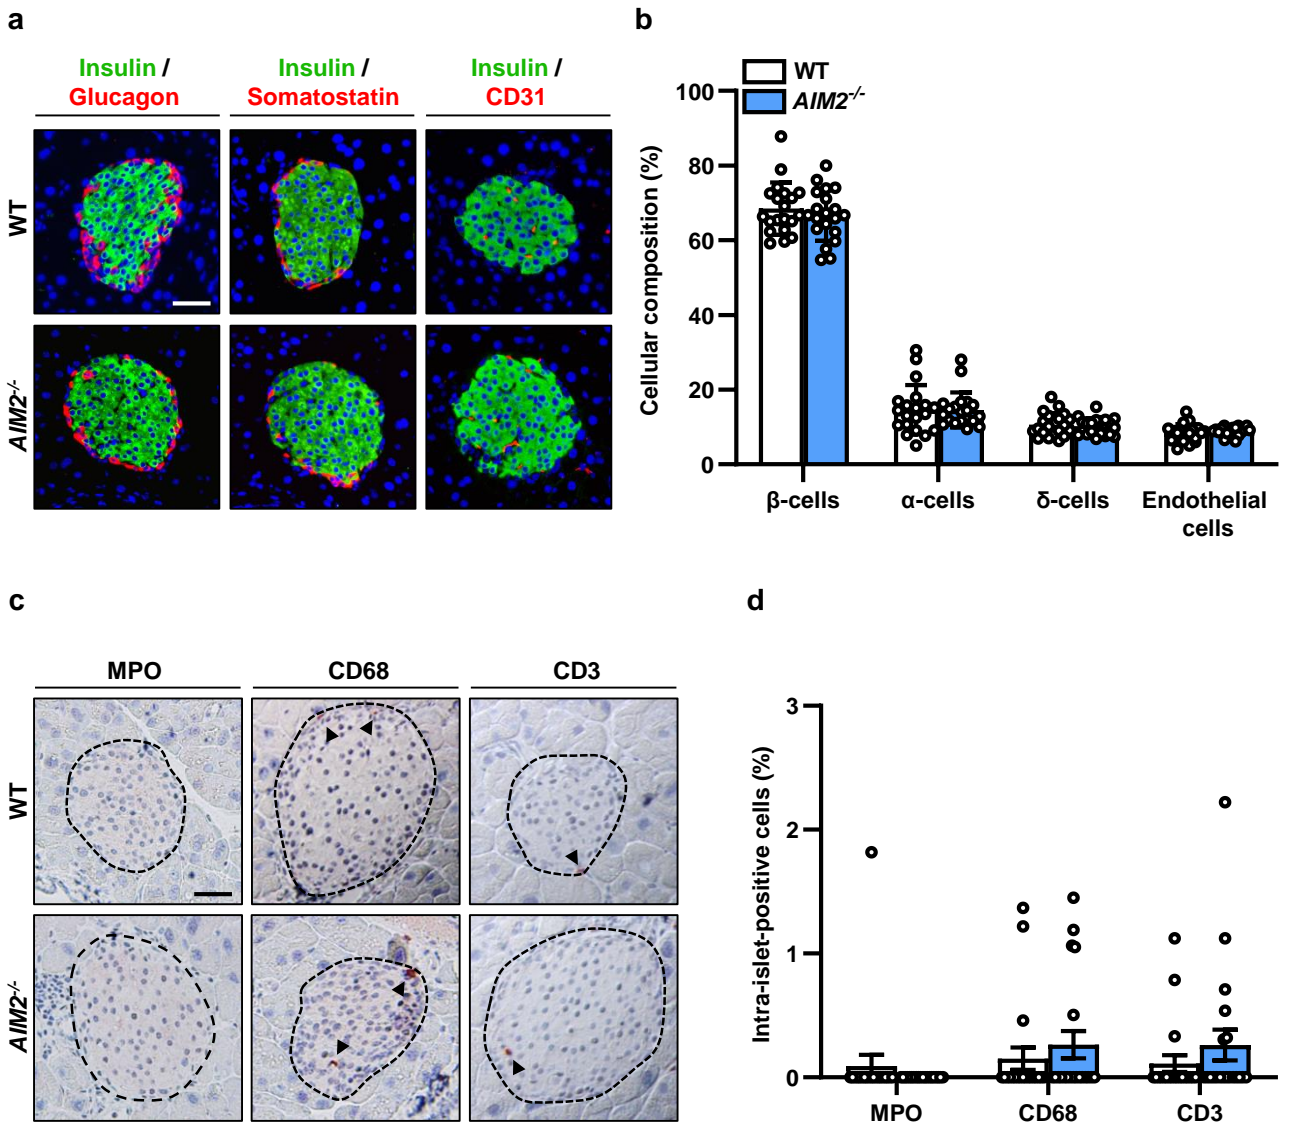

**Figure S1.** Cellular composition of islets within the pancreas. (a) Representative immunofluorescence stainings of insulin/glucagon, insulin/somatostatin and insulin/CD31 in WT and *AIM2*<sup>-/-</sup> islets within the pancreas. Cell nuclei were stained with Hoechst 33342 (blue). Scale bar: 50  $\mu$ m. (b) Quantitative analysis of insulin- ( $\beta$ -cells), glucagon- ( $\alpha$ -cells), somatostatin- ( $\delta$ -cells) and CD31- (endothelial) positive cells (in % of all islet cells) in WT and *AIM2*<sup>-/-</sup> islets within the pancreas (n = 20 each). Mean  $\pm$  SEM. (c) Representative immunohistochemical stainings of MPO-, CD68- and CD3-positive cells in WT and *AIM2*<sup>-/-</sup> islets within the pancreas. Scale bar: 50  $\mu$ m. (d) Quantitative analysis of MPO-, CD68- and CD3-positive cells (in % of all islet cells) in WT and *AIM2*<sup>-/-</sup> islets within the pancreas (n = 20 each). Mean  $\pm$  SEM.

## Figure S2

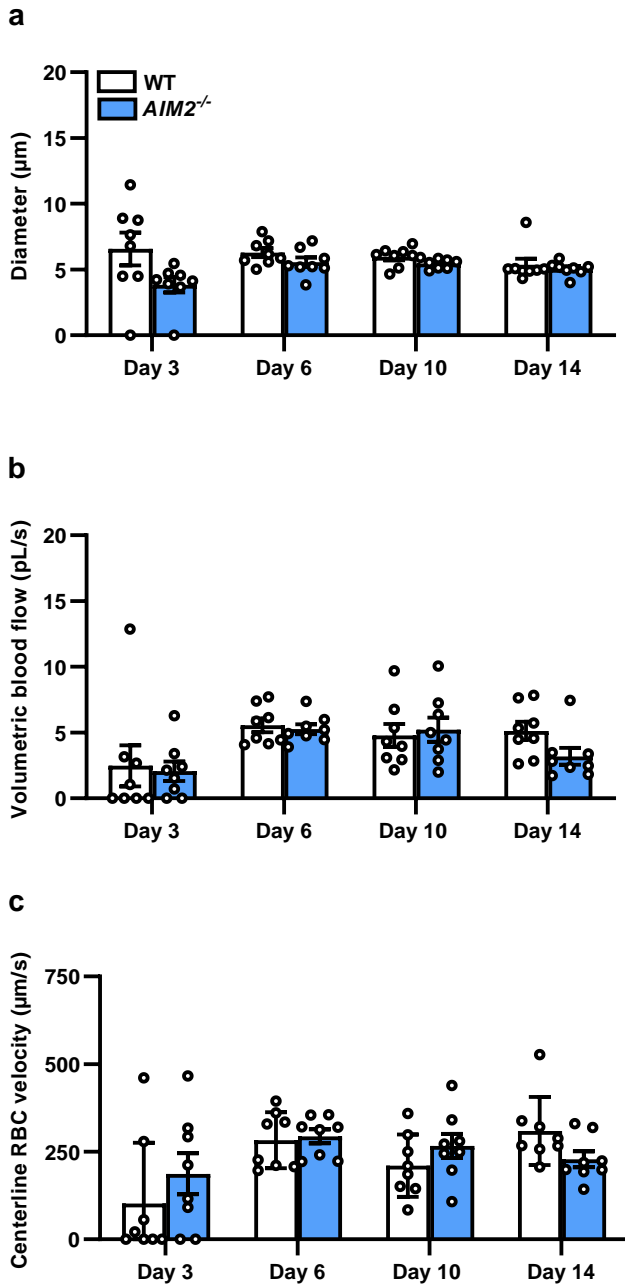

**Figure S2.** Microhemodynamic parameters of transplanted islets. (a-c) Quantitative analysis of microvessel diameters ( $\mu\text{m}$ ) (a), centerline RBC velocities ( $\mu\text{m/s}$ ) (b) and volumetric blood flows ( $\text{pL/s}$ ) (c) within WT and  $AIM2^{-/-}$  islets transplanted onto the exposed striated muscle tissue ( $n = 8$  each). Mean  $\pm$  SEM.

**Figure S3**

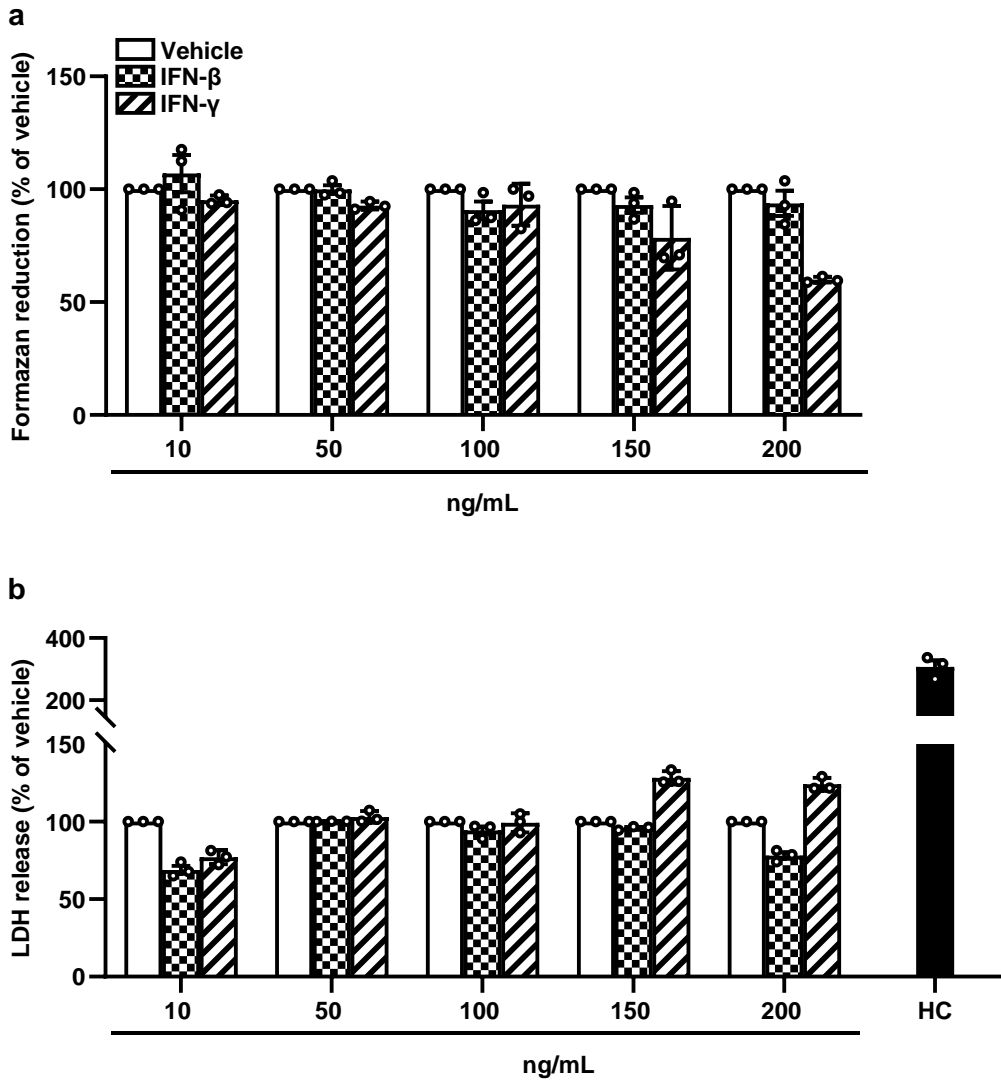

**Figure S3.** Effect of IFN- $\beta$  and IFN- $\gamma$  on the proliferation of HUVEC. **(a)** HUVEC were treated with vehicle, IFN- $\beta$  or IFN- $\gamma$  for 24 h and the mitochondrial activity was analyzed by a WST-1 assay. Data are expressed in % of vehicle ( $n = 3$  each). Mean  $\pm$  SEM. **(b)** HUVEC were treated as described in (a) and the cytotoxicity was assessed by a LDH assay. Data are expressed in % of vehicle ( $n = 3$  each). Cells were permeabilized with Triton-X100 (0.1%) and used as high toxicity control (HC) for the LDH assay ( $n = 3$  each). Mean  $\pm$  SEM.

## Figure S4

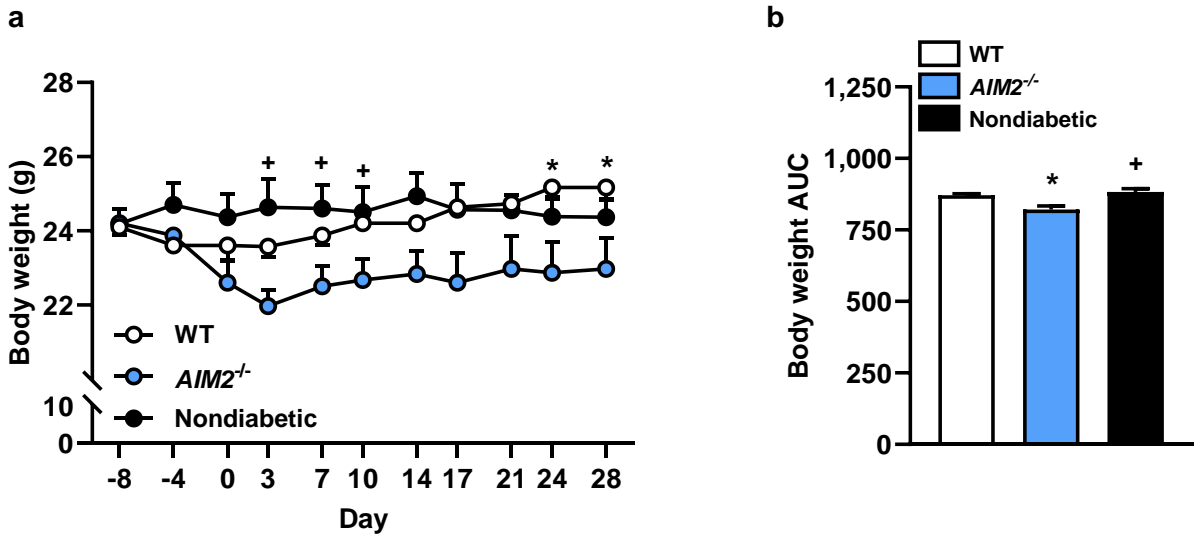

**Figure S4.** Body weights of islet transplanted mice. **(a)** Quantitative analysis of the body weights (g) of mice transplanted with WT and *AIM2*<sup>-/-</sup> islets (n = 6 each). Nondiabetic mice served as negative control (n = 6 each). Mean ± SEM. \*P < 0.05 vs. WT; +P < 0.05 vs. *AIM2*<sup>-/-</sup>. **(b)** AUC of the body weights from (a) (n = 6 each). Mean ± SEM. \*P < 0.05 vs. WT; +P < 0.05 vs. *AIM2*<sup>-/-</sup>.
